# Supplementary material for: Prognosis of Regenerative Endodontic Procedures in Mature Teeth: A Systematic Review and Meta-Analysis of Clinical and Radiographic Parameters
Source: MDPI journal article supplement (doi:10.3390/ma14164418), 2021-08-06
Supplement: s1 [file s1]

## Prognosis of regenerative endodontic procedures in mature teeth: a systematic review and meta-analysis of clinical and ra-diographic parameters

Table S3. Quality Assessment Tool for Before-After (Pre-Post) Studies

|                                                                                                                                                                                                                             | Brizuela<br>et al. 2020<br>[37] | El-Kateb<br>et al.<br>2020 [39] | Arslan et<br>al. 2019<br>[35] | Jha et al.<br>2019 [36] | Nageh <i>et</i><br><i>al.</i> 2018<br>[34] | Shah<br>2016 [33] | Shah &<br>Logani<br>2012 [31] |
|-----------------------------------------------------------------------------------------------------------------------------------------------------------------------------------------------------------------------------|---------------------------------|---------------------------------|-------------------------------|-------------------------|--------------------------------------------|-------------------|-------------------------------|
| 1. Was the study question or objective clearly stated?                                                                                                                                                                      | Y                               | Y                               | Y                             | Y                       | Y                                          | Y                 | N                             |
| 2. Were eligibility/selection criteria for the study population prespecified and clearly described?                                                                                                                         | Y                               | Y                               | Y                             | Y                       | Y                                          | Y                 | NR                            |
| 3. Were the participants in the study representative of those who would be eligible for the test/service/intervention in the general or clinical population of interest?                                                    | Y                               | Y                               | Y                             | Y                       | Y                                          | Y                 | Y                             |
| 4. Were all eligible participants that met the prespecified entry criteria enrolled?                                                                                                                                        | NR                              | Y                               | Y                             | NR                      | NR                                         | NR                | NR                            |
| 5. Was the sample size sufficiently large to provide confidence in the findings?                                                                                                                                            | N                               | Y                               | N                             | N                       | N                                          | N                 | N                             |
| 6. Was the test/service/intervention clearly described and delivered consistently across the study population?                                                                                                              | Y                               | Y                               | Y                             | Y                       | Y                                          | Y                 | Y                             |
| 7. Were the outcome measures prespecified, clearly defined, valid, reliable, and assessed consistently across all study participants?                                                                                       | Y                               | Y                               | Y                             | Y                       | Y                                          | N                 | N                             |
| 8. Were the people assessing the outcomes blinded to the participants' exposures/interventions?                                                                                                                             | Y                               | Y                               | Y                             | Y                       | N                                          | N                 | N                             |
| 9. Was the loss to follow-up after baseline 20% or less? Were those lost to follow-up accounted for in the analysis?                                                                                                        | Y                               | Y                               | Y                             | Y                       | Y                                          | Y                 | N                             |
| 10. Did the statistical methods examine changes in outcome measures from before to after the intervention? Were statistical tests done that provided p values for the pre-to-post changes?                                  | Y                               | Y                               | NR                            | Y                       | Y                                          | N                 | N                             |
| 11. Were outcome measures of interest taken multiple times before the intervention and multiple times after the intervention (i.e., did they use an interrupted time-series design)?                                        | N                               | N                               | N                             | N                       | N                                          | N                 | N                             |
| 12. If the intervention was conducted at a group level (e.g., a whole hospital, a community, etc.) did the statistical analysis take into account the use of individual-level data to determine effects at the group level? | NA                              | NA                              | NA                            | NA                      | NA                                         | NA                | NA                            |
| QUALITY RATING                                                                                                                                                                                                              | GOOD                            | GOOD                            | GOOD                          | GOOD                    | FAIR                                       | FAIR              | POOR                          |

\*CD, cannot determine; NA, not applicable; NR, not reported; Y, Yes; N, No.
