# Supplementary material for: Prognosis of Regenerative Endodontic Procedures in Mature Teeth: A Systematic Review and Meta-Analysis of Clinical and Radiographic Parameters
Source: MDPI journal article supplement (doi:10.3390/ma14164418), 2021-08-06
Supplement: s1 [file s1]

## Prognosis of regenerative endodontic procedures in mature teeth: a systematic review and meta-analysis of clinical and radiographic parameters

**Table S2.** Full text evaluated and excluded from systematic review.

| Author                                                                              | Reference                                                                                                                                                                                                                                                                  | Year | Open Apex | Primary dentition | In vitro | Animal | Case Reports | Review | Of Topic | Cochrane Abstracts | Select |
|-------------------------------------------------------------------------------------|----------------------------------------------------------------------------------------------------------------------------------------------------------------------------------------------------------------------------------------------------------------------------|------|-----------|-------------------|----------|--------|--------------|--------|----------|--------------------|--------|
| Gioventù S, Andriolo G, Bonino F, Frasca S, Lazzari L, Montelatici E <i>et al.</i>  | A novel method for banking dental pulp stem cells. <i>Transfus Apher Sci</i> <b>47</b> (2), 199-206                                                                                                                                                                        | 2012 |           |                   |          |        |              |        | X        |                    |        |
| Shah N                                                                              | A regeneration-based, nonobturation root-canal treatment for fully-mature teeth: Six years experience with »sealBio«. <i>Contemporary Clinical Dentistry</i> <b>7</b> (3), 296-301                                                                                         | 2016 |           |                   |          |        |              |        |          |                    | X      |
| Jha P, Virdi MS, Nain S.                                                            | A Regenerative Approach for Root Canal Treatment of Mature Permanent Teeth: Comparative Evaluation with 18 Months Follow-up. <i>Int J Clin Pediatr Dent</i> <b>12</b> (3), 182–188                                                                                         | 2019 |           |                   |          |        |              |        |          |                    | X      |
| Bucchi C, Gimeno-Sandig A., Valdivia-Gandur I, Manzanares-Céspedes C, De Anta JM.   | A Regenerative Endodontic Approach in Mature Ferret Teeth Using Rodent Preameloblast-conditioned Medium. <i>In Vivo</i> <b>33</b> (4),1143-1150.                                                                                                                           | 2019 |           |                   |          | X      |              |        |          |                    |        |
| Kahler B, Chugal N, Lin LM                                                          | Alkaline materials and regenerative endodontics: A review. <i>Materials</i> <b>10</b> (12),1389.                                                                                                                                                                           | 2017 |           |                   |          |        |              | X      |          |                    |        |
| Cordero CB, Santander GM, González DU, Quezada A, Silva CI, Vásquez C <i>et al.</i> | Allogeneic Cellular Therapy in a Mature Tooth with Apical Periodontitis and Accidental Root Perforation: A Case Report. <i>Journal of Endodontics</i> <b>46</b> (12), 1920-1927.e1                                                                                         | 2020 |           |                   |          |        | X            |        |          |                    |        |
| Kahler B, Rossi-Fedele G, Chugal N, Lin LM                                          | An Evidence-based Review of the Efficacy of Treatment Approaches for Immature Permanent Teeth with Pulp Necrosis. <i>Journal of Endodontics</i> <b>43</b> (7), 1052-1057.                                                                                                  | 2017 | X         |                   |          |        |              |        |          |                    |        |
| Jacobs JC, Troxel A, Ehrlich Y, Gregory RL, Yassen GH <i>et al.</i>                 | Antibacterial Effects of Antimicrobials Used in Regenerative Endodontics against Biofilm Bacteria Obtained from Mature and Immature Teeth with Necrotic Pulps. <i>Journal of Endodontics</i> <b>43</b> (4),575-579                                                         | 2017 |           |                   |          |        |              |        | X        |                    |        |
| Guadarrama PO, Guadarrama QLJ, Robles B, Norma L                                    | Aplicaciones odontológicas de las células madre pulpaes de dientes temporales y permanentes: revisión de estudios in vivo/ Dental applications of pulpal stem cells of temporary and permanent teeth: review of in vivo studies. <i>Revista ADM</i> <b>75</b> (3),127-134. | 2018 |           |                   |          |        |              | X      |          |                    |        |
| Nageh M, Ahmed GM, El-baz AA                                                        | Assessment of Regaining Pulp Sensibility in Mature Necrotic Teeth Using a Modified Revascularization Technique with Platelet-rich Fibrin: A Clinical Study. <i>J Endod</i> <b>44</b> (10),1526–1533.                                                                       | 2018 |           |                   |          |        |              |        |          |                    | X      |
| NCT04158232                                                                         | Assessment of Regenerative Potential of Mature Permanent Teeth With Necrotic Pulps Using Two Revascularization Protocols. (In Vivo Study)                                                                                                                                  | 2020 |           |                   |          |        |              |        |          | X                  |        |

Continue

| Author                                                                   | Reference                                                                                                                                                                                                                                                                 | Year | Open<br>Apex | Primary<br>dentition | In<br>vitro | Animal | Case<br>Reports | Review | Of<br>Topic | Cochrane<br>Abstracts | Select |
|--------------------------------------------------------------------------|---------------------------------------------------------------------------------------------------------------------------------------------------------------------------------------------------------------------------------------------------------------------------|------|--------------|----------------------|-------------|--------|-----------------|--------|-------------|-----------------------|--------|
| Del Fabbro M, Lolato A, Bucchi C, Taschieri S, Weinstein RL              | Autologous Platelet Concentrates for Pulp and Dentin Regeneration: A Literature Review of Animal Studies. <i>Journal of Endodontics</i> 42(2), 250-257                                                                                                                    | 2016 |              |                      |             |        |                 | X      |             |                       |        |
| Jung IY, Lee SJ, Hargreaves KM,                                          | Biologically Based Treatment of Immature Permanent Teeth with Pulpal Necrosis: A Case Series. <i>Texas dental journal</i> 129(6), 601-616                                                                                                                                 | 2012 |              |                      |             |        | X               |        |             |                       |        |
| Raddall G, Mello I, Leung BM                                             | Biomaterials and Scaffold Design Strategies for Regenerative Endodontic Therapy. <i>Frontiers in Bioengineering and Biotechnology</i> 7.                                                                                                                                  | 2019 |              |                      |             |        |                 |        | X           |                       |        |
| Bagú L, Barbich M                                                        | Bone formation from dental pulp stem cells [Article@Formación de tejido óseo a partir de células madre de pulpa dental]. <i>Actualizaciones en Osteología</i> 11(3), 220-226                                                                                              | 2015 |              |                      |             |        |                 | X      |             |                       |        |
| Brizuela C, Meza G, Urrejola D, Quezada MA, Concha G, Ramírez V, et al.  | Cell-Based Regenerative Endodontics for Treatment of Periapical Lesions: A Randomized, Controlled Phase I/II Clinical Trial. <i>Journal of Dental Research</i> , 99(5), pp. 523-529                                                                                       | 2020 |              |                      |             |        |                 |        |             |                       | X      |
| Maria OM, Khosravi R, Mezey E, Tran SD                                   | Cells from bone marrow that evolve into oral tissues and their clinical applications. <i>Oral Diseases</i> 13(1), 11-16                                                                                                                                                   | 2007 |              |                      |             |        |                 | X      |             |                       |        |
| Wen Q, Jing J, Han X, Ho TV, Cha, Y.                                     | Cellular and molecular mechanisms of tooth root development. 35(11), 2252-2264                                                                                                                                                                                            | 2020 |              |                      |             |        |                 | X      |             |                       |        |
| Yazid F, Luchman NA, Wahab RMA, Ariffin SHZ                              | Characterization and osteogenic differentiation of human dental pulp stem cells and stem cells from exfoliated deciduous teeth [Article@Pencirian dan pembezaan osteogenik sel stem pulpa gigi kekal dan gigi desiduus manusia]. <i>Sains Malaysiana</i> 48(7), 1483-1490 | 2019 |              |                      | X           |        |                 |        |             |                       |        |
| TCTR20161221002                                                          | Clinical evaluation of regenerative endodontic treatment success in mature teeth with periapical lesion                                                                                                                                                                   | 2016 |              |                      |             |        |                 |        |             | X                     |        |
| Chrepa V, Joon R, Austah O, Diogenes A, Hargreaves KM, Ezeldeen M et al. | Clinical Outcomes of Immature Teeth Treated with Regenerative Endodontic Procedures-A San Antonio Study. <i>Journal of Endodontics</i> 46 (8), 1074-1084.                                                                                                                 | 2020 | X            |                      |             |        |                 |        |             |                       |        |
| Wang H, Zhong Q, Yang T, Qi Y, Fu M, Yang X et al.                       | Comparative characterization of SHED and DPSCs during extended cultivation in vitro. <i>Mol Med Rep</i> 17(5), 6551-6559                                                                                                                                                  | 2018 |              |                      | X           |        |                 |        |             |                       |        |
| Wang X, Sha XJ, Li GH, Yang FS, Ji K, Wen LY et al.                      | Comparative characterization of stem cells from human exfoliated deciduous teeth and dental pulp stem cells. <i>Arch Oral Biol</i> 57(9), 1231-1240                                                                                                                       | 2012 |              |                      | X           |        |                 |        |             |                       |        |
| Rasha AR, Amr EAEL, Norhan AEWED                                         | Comparative Study between Revitalization of Necrotic Immature Permanent Anterior Teeth with and without Platelet Rich Fibrin: A Randomized Controlled Trial. <i>J Clin Pediatr Dent</i> 43 (2), 78-85.                                                                    | 2019 | X            |                      |             |        |                 |        |             |                       |        |
| Nakajima K, Kunimatsu R, Ando K,                                         | Comparison of the bone regeneration ability between stem cells from human exfoliated deciduous teeth, human dental                                                                                                                                                        | 2018 |              |                      | X           |        |                 |        |             |                       |        |

Continue

| Author                                                                               | Reference                                                                                                                                                                                                                  | Year | Open Apex | Primary dentition | In vitro | Animal | Case Reports | Review | Of Topic | Cochrane Abstracts | Select |
|--------------------------------------------------------------------------------------|----------------------------------------------------------------------------------------------------------------------------------------------------------------------------------------------------------------------------|------|-----------|-------------------|----------|--------|--------------|--------|----------|--------------------|--------|
| Ando T, Hayashi Y, Kihara T <i>et al.</i>                                            | pulp stem cells and human bone marrow mesenchymal stem cells. <i>Biochem Biophys Res Commun</i> <b>497</b> (3), 876-882.                                                                                                   |      |           |                   |          |        |              |        |          |                    |        |
| Shah N, Jadhav GR, Mitta P, Logan A                                                  | Conservative management of dens evaginatus and attached supernumerary tooth/odontome in mandibular premolar with dual radiolucencies. <i>Contemp Clin Dent</i> <b>6</b> (Suppl 1), S269-273                                | 2015 |           |                   |          |        | X            |        |          |                    |        |
| Lin LM, Kim SG, Martin G, Kahler B.                                                  | Continued root maturation despite persistent apical periodontitis of immature permanent teeth after failed regenerative endodontic therapy. <i>Aust Endod J</i> <b>44</b> (3),292-299                                      | 2018 | X         |                   |          |        |              |        |          |                    |        |
| Seirawan MY, Layous K, Seirawan MK, Doumani M                                        | Coronal discoloration related to bioceramic and mineral trioxide aggregate coronal barrier in non-vital mature teeth undergoing regenerative endodontic procedures. <i>World Journal of Dentistry</i> <b>11</b> (1), 52-60 | 2020 |           |                   |          |        |              |        | X        |                    |        |
| Thier M, Bußmeier U, Langenhan J, Kopp S                                             | Cranio-mandibular dysfunction in therapy with intraoral advancement splints. <i>Manuelle Medizin</i> <b>52</b> (6),521-526                                                                                                 | 2014 |           |                   |          |        |              |        | X        |                    |        |
| Pilbauerová N, Suchánek J                                                            | Cryopreservation of Dental Stem Cells. <i>Acta Medica</i> <b>61</b> (1) 1-7                                                                                                                                                | 2018 |           |                   |          |        |              |        | X        |                    |        |
| Ma L, Makino Y, Yamaza H, Akiyama K, Hoshino Y, Song G <i>et al.</i>                 | Cryopreserved dental pulp tissues of exfoliated deciduous teeth is a feasible stem cell resource for regenerative medicine. <i>PLoS One</i> <b>7</b> (12), e51777                                                          | 2012 |           | X                 |          |        |              |        |          |                    |        |
| Matoug-Elwerfelli M                                                                  | Decellularisation of the dental pulp for use as a scaffold in regenerative endodontics.                                                                                                                                    | 2017 |           |                   |          |        |              |        | X        |                    |        |
| Chrepa V, Henry MA, Daniel BJ, Diogenes A                                            | Delivery of apical mesenchymal stem cells into root canals of mature teeth. <i>J Dent Res</i> <b>94</b> (12), 1653-1659.                                                                                                   | 2015 |           |                   |          |        |              |        | X        |                    |        |
| Martínez-Sarrà E, Montori S, Gil-Recio C, Sampaolesi M, Atari M <i>et al.</i>        | Dental pulp stem cells promote wound healing and muscle regeneration. <i>Stem Cell Genetics for Biomedical Research: Past, Present, and Future</i> , 221-240                                                               | 2018 |           |                   |          |        |              |        | X        |                    |        |
| Botelho J, Cavacas MA, Machado V, Mendes JJ                                          | Dental stem cells: recent progresses in tissue engineering and regenerative medicine. <i>Annals of medicine</i> , <b>49</b> (8), 644–651                                                                                   | 2017 |           |                   |          |        |              |        | X        |                    |        |
| Hirayama M, Oshima M, Tsuji T                                                        | Development and prospects of organ replacement regenerative therapy. <i>Cornea</i> <b>32</b> , S13-S2                                                                                                                      | 2013 |           |                   |          |        |              | X      |          |                    |        |
| Otsu K, Kishigami R, Oikawa-Sasaki A, Fukumoto S, Yamada A, Fujiwara N <i>et al.</i> | Differentiation of induced pluripotent stem cells into dental mesenchymal cells. <i>Stem Cells Dev</i> <b>21</b> (7), 1156-1164                                                                                            | 2012 |           |                   | X        |        |              |        |          |                    |        |
| NCT03652129                                                                          | Digitized Assessment for the Survival of Mature Anterior Teeth With Periapical Lesion After One Step Regenerative Approach Using Different Asepsis Maneuvers                                                               | 2018 |           |                   |          |        |              |        |          | X                  |        |
| Latham J, Fong H, Jewett A, Johnson JD, Paranjpe A.                                  | Disinfection Efficacy of Current Regenerative Endodontic Protocols in Simulated Necrotic Immature Permanent Teeth. <i>J Endod</i> <b>42</b> (8), 1218-1225                                                                 | 2016 | X         |                   |          |        |              |        |          |                    |        |
| Paino F, Ricci G, De Rosa A, Tirino V, Papaccio G                                    | Ecto-mesenchymal stem cells from dental pulp are committed to differentiate into active melanocytes. <i>European Cells and Materials</i> <b>20</b> , 295-305                                                               | 2010 |           |                   | X        |        |              |        |          |                    |        |

Continue

| Author                                                                         | Reference                                                                                                                                                                                                                                                                                                   | Year | Open Apex | Primary dentition | In vitro | Animal | Case Reports | Review | Of Topic | Cochrane Abstracts | Select |
|--------------------------------------------------------------------------------|-------------------------------------------------------------------------------------------------------------------------------------------------------------------------------------------------------------------------------------------------------------------------------------------------------------|------|-----------|-------------------|----------|--------|--------------|--------|----------|--------------------|--------|
| NCT04313010                                                                    | Effectiveness of Regenerative Endodontics Therapy for Single-rooted Mature Permanent Tooth With Pulp Necrosis                                                                                                                                                                                               | 2020 |           |                   |          |        |              |        |          | X                  |        |
| Hill, ST                                                                       | Effects of DynaMatrix on Angiogenic Cytokine and Matrix Metalloproteinase Expression from Human Endothelial Cells: An In-vitro Study.                                                                                                                                                                       | 2015 |           |                   | X        |        |              |        |          |                    |        |
| Bastidas C, Magda Z, Alvarez A, Diana P, Vélez L, Elenor M et al.              | El rol de la pasta triple antibiótica en endodoncia regenerativa: una revisión bibliográfica/ The role of the triple antibiotic paste in regenerative endodontics: a review of the literature. <i>Rev. Asoc. Odontol. Argent</i> <b>105</b> (3), 123-132                                                    | 2017 |           |                   |          |        |              | X      |          |                    |        |
| NCT03102879                                                                    | Encapsulated Mesenchymal Stem Cells for Dental Pulp Regeneration                                                                                                                                                                                                                                            | 2017 |           |                   |          |        |              |        | X        |                    |        |
| Jung, M                                                                        | Endodontics in the immature permanent dentition - Vital pulp therapy, apexification and regeneration [Article@Endodontie in der unreifen bleibenden Dentition - Maßnahmen zur Vitalerhaltung, Apexifikation und Regeneration der Pulpa]. <i>Oralprophylaxe und Kinderzahnheilkunde</i> <b>38</b> (1), 29-45 | 2016 | X         |                   |          |        |              |        |          |                    |        |
| Bucchi C, Gimeno-Sandig A, Manzanares-Céspedes C                               | Enlargement of the apical foramen of mature teeth by instrumentation and apicoectomy. A study of effectiveness and the formation of dentinal cracks. <i>Acta Odontologica Scandinavica</i> <b>75</b> (7), 488-495                                                                                           | 2017 |           |                   |          |        |              |        | X        |                    |        |
| Tomokazu H, Naoyuki C, Takeyoshi A, Yoshitaka Y, Akira I, Mitsuro T            | Establishment of clonal periodontal ligament cell line derived from deciduous tooth immortalized by human telomerase reverse transcriptase (hTERT) gene transfer. <i>Interface Oral Health Science</i> , 114-116                                                                                            | 2011 |           |                   | X        |        |              |        |          |                    |        |
| Boisvert, M                                                                    | Étude de l'effet d'une matrice à base de collagène sur la différenciation des cellules souches de la pulpe dentaire en odontoblastes. Université Laval, Thèses et mémoires.                                                                                                                                 | 2019 |           |                   |          |        |              |        | X        |                    |        |
| Linsuwanont P, Sinpitaksakul P, Lertsakchai T                                  | Evaluation of root maturation after revitalization in immature permanent teeth with nonvital pulps by cone beam computed tomography and conventional radiographs. <i>International Endodontic Journal</i> <b>50</b> (9), 836-846                                                                            | 2016 | X         |                   |          |        |              |        |          |                    |        |
| Gebhardt, M                                                                    | Evaluation of tissue engineering scaffolds for regenerative endodontic treatment                                                                                                                                                                                                                            | 2008 |           |                   |          |        |              |        | X        |                    |        |
| Bucchi Morales MC                                                              | Experimental Approaches for Pulp Tissue Regeneration. PhD Thesis.                                                                                                                                                                                                                                           | 2019 |           |                   | X        |        |              |        |          |                    |        |
| Yang JZ, Ouyang Y, Liao Q                                                      | Experimental study on pulp revitalization of Beagle dog's immature permanent teeth after pulpectomy. <i>Chinese Journal of Stomatology</i> <b>46</b> (8),489-493                                                                                                                                            | 2011 |           |                   |          | X      |              |        |          |                    |        |
| Jayaraman P, Govindasamy V, Gnanasegaran N, Kunasekaran W, Vasanthan P, Musa S | Expression patterns of immune genes in long-term cultured dental stem cells., <i>Clinical Oral Investigations</i> <b>20</b> (1), 109-116.                                                                                                                                                                   | 2015 |           |                   | X        |        |              |        |          |                    |        |

Continue

| Author                                                                        | Reference                                                                                                                                                                                                                                                                                               | Year | Open Apex | Primary dentition | In vitro | Animal | Case Reports | Review | Of Topic | Cochrane Abstracts | Select |
|-------------------------------------------------------------------------------|---------------------------------------------------------------------------------------------------------------------------------------------------------------------------------------------------------------------------------------------------------------------------------------------------------|------|-----------|-------------------|----------|--------|--------------|--------|----------|--------------------|--------|
| Hirayama M, Tsubota K, Tsuji T                                                | Functional lacrimal gland regeneration. <i>Organ Regeneration Based on Developmental Biology</i> , 135-151                                                                                                                                                                                              | 2017 |           |                   |          |        |              |        | X        |                    |        |
| Oshima M, Mizuno M, Imamura A, Saito M, Tsuj, T.                              | Functional tooth regeneration using a bioengineered tooth unit as a mature organ replacement regenerative therapy. <i>PLoS ONE</i> , 6(7), e21531                                                                                                                                                       | 2011 |           |                   |          | X      |              |        |          |                    |        |
| Mimeault M, Batra SK                                                          | Great promise of tissue-resident adult stem/progenitor cells in transplantation and cancer therapies. <i>Advances in Experimental Medicine and Biology</i> 741, 171-186                                                                                                                                 | 2012 |           |                   |          |        |              |        | X        |                    |        |
| Fouad AF, Verma P                                                             | Healing after regenerative procedures with and without pulpal infection. <i>Journal of Endodontics</i> 40(4 SUPPL.), S58-S64                                                                                                                                                                            | 2014 |           |                   |          |        |              | X      |          |                    |        |
| Shiehazadeh F, Shiehazadeh V, Aghmasheh F, Joulae M, Kosarieh E <i>et al.</i> | Healing of large periapical lesions following delivery of dental stem cells with an injectable scaffold: New method and three case reports. <i>Indian Journal of Dental Research</i> 25(2), 248-253                                                                                                     | 2014 |           |                   |          |        | X            |        |          |                    |        |
| Digka A, Sakka D, Lyroudia K                                                  | Histological assessment of human regenerative endodontic procedures (REP) of immature permanent teeth with necrotic pulp/apical periodontitis: A systematic review. <i>Australian endodontic journal</i> 46 (1), 140-153.                                                                               | 2020 |           |                   |          |        |              | X      |          |                    |        |
| Arslan H, Şahin Y, Topçuoğlu HS, Gündoğdu B                                   | Histologic Evaluation of Regenerated Tissues in the Pulp Spaces of Teeth with Mature Roots at the Time of the Regenerative Endodontic Procedures. <i>Journal of Endodontics</i> 45(11), 1384-1389                                                                                                       | 2019 |           |                   |          |        | X            |        |          |                    |        |
| Breivik M                                                                     | Human odontoblast response to tooth replantation. <i>European Journal of Orthodontics</i> 3(2), 95-108                                                                                                                                                                                                  | 1981 |           |                   |          |        |              |        | X        |                    |        |
| Czerniuk MR, Zaremba, M                                                       | Immediate implant placement after extraction of central incisor in the maxilla after injury - Case report. <i>Dental and Medical Problems</i> 49(4), 600-606                                                                                                                                            | 2012 |           |                   |          |        |              |        | X        |                    |        |
| Zhu X, Wang Y, Liu Y, Huang GT-J, Zhang C                                     | Immunohistochemical and histochemical analysis of newly formed tissues in root canal space transplanted with dental pulp stem cells plus platelet-rich plasma. <i>Journal of Endodontics</i> 40(10), 1573-1578                                                                                          | 2014 |           |                   | X        |        |              |        |          |                    |        |
| Tamaki Y, Nakahara T, Ishikawa H, Sato S                                      | In vitro analysis of mesenchymal stem cells derived from human teeth and bone marrow. <i>Odontology</i> 101(2), 121-132.                                                                                                                                                                                | 2012 |           |                   | X        |        |              |        |          |                    |        |
| Oliveira AP                                                                   | Influência de medicações intracanal utilizadas em procedimentos endodônticos regenerativos na sobrevivência de células da papila apical in vitro / Influence of intracanal medications used in regenerative endodontic procedures on survival of apical papilla cells in vitro. Master's Dissertation.  | 2015 |           |                   | X        |        |              |        |          |                    |        |
| Duggal M, Tong HJ, Al-Ansary M, Twati W, Day PF, Nazzal H                     | Interventions for the endodontic management of non-vital traumatised immature permanent anterior teeth in children and adolescents: a systematic review of the evidence and guidelines of the European Academy of Paediatric Dentistry. <i>European Archives of Paediatric Dentistry</i> 18(3), 139-151 | 2017 |           |                   |          |        |              | X      |          |                    |        |
| Ahangari Z, Nasser M, Mahdian M,                                              | Interventions for the management of external root resorption. <i>Cochrane Database of Systematic Reviews</i> .                                                                                                                                                                                          | 2015 |           |                   |          |        |              |        | X        |                    |        |

Continue

| Author                                                                                         | Reference                                                                                                                                                               | Year | Open Apex | Primary dentition | In vitro | Animal | Case Reports | Review | Of Topic | Cochrane Abstracts | Select |
|------------------------------------------------------------------------------------------------|-------------------------------------------------------------------------------------------------------------------------------------------------------------------------|------|-----------|-------------------|----------|--------|--------------|--------|----------|--------------------|--------|
| Fedorowicz Z, Marchesan MA                                                                     |                                                                                                                                                                         |      |           |                   |          |        |              |        |          |                    |        |
| Tsilingaridis G, Malmgren B, Andreasen JO, Malmgren O                                          | Intrusive luxation of 60 permanent incisors: a retrospective study of treatment and outcome. <i>Dental Traumatology</i> 28(6), 416-422                                  | 2012 |           |                   |          |        |              |        | X        |                    |        |
| Raymond R                                                                                      | Investigation of new regenerative endodontic therapies utilizing in vitro and non-human primate models.                                                                 | 2011 |           |                   |          | X      |              |        |          |                    |        |
| Cielecki M                                                                                     | Investigation of the effects of oral pathogens, antibiotics, and disinfectants on regenerative endodontic treatment.                                                    | 2011 |           |                   |          |        |              |        | X        |                    |        |
| Fahmy SH, Hassanien EES, Nagy MM, El Batouty KM, Mekhemar M, Fawzy El Sayed K, Dörfer C et al. | Investigation of the regenerative potential of necrotic mature teeth following different revascularisation protocols. <i>Australian Endodontic Journal</i> 43(2), 75-84 | 2017 |           |                   |          | X      |              |        |          |                    |        |
| Chen Y-P, Jovani-Sancho M del M, Sheth CC                                                      | Is revascularization of immature permanent teeth an effective and reproducible technique? <i>Dent Traumatol</i> 31(6), 429-436                                          | 2015 | X         |                   |          |        |              |        |          |                    |        |
| Pelaez D, Huang C-YC, Cheung HS                                                                | Isolation of pluripotent neural crest-derived stem cells from adult human tissues by connexin-43 enrichment. <i>Stem Cells and Development</i> 22(21), 2906-2914        | 2013 |           |                   |          |        |              |        | X        |                    |        |
| Maria OM, Khosravi R, Mezey E, Tran SD                                                         | Cells from bone marrow that evolve into oral tissues and their clinical applications. <i>Oral Diseases</i> 13(1), 11-16                                                 | 2007 |           |                   |          |        |              |        | X        |                    |        |
| Chan EKM, Desmeules M, Cielecki M, Dabbagh B, Ferraz dos Santos B                              | Longitudinal Cohort Study of Regenerative Endodontic Treatment for Immature Necrotic Permanent Teeth. <i>Journal of Endodontics</i> 43(3), 395-400                      | 2017 | X         |                   |          |        |              |        |          |                    |        |
| Weigel C, Bragger U, Hammerle CHF, Mombelli A, Lang NP                                         | Maintenance of new attachment 1 and 4 years following guided tissue regeneration (GTR). <i>Journal of Clinical Periodontology</i> 22(9), 661-669                        | 1995 |           |                   |          |        |              |        | X        |                    |        |
| Verma PK, Srivastava R, Gupta KK, Srivastava A                                                 | Management of combined endodontic - periodontal lesion: Case reports. <i>Medico-Legal Update</i> 12(1), 107-109                                                         | 2012 |           |                   |          |        | X            |        |          |                    |        |
| Saoud TMA, Huang GT-J, Gibbs JL, Sigurdsson A, Lin LM                                          | Management of immature necrotic permanent teeth with regenerative endodontic procedures - a review of literature. <i>Journal of Endodontics</i> 41(10), 1743-1748       | 2015 |           |                   |          |        |              | X      |          |                    |        |
| Moodley DS, Peck C, Moodley T, Patel N                                                         | Management of necrotic pulp of immature permanent incisor tooth: A regenerative endodontic treatment protocol: case report. <i>SADJ</i> 72 (3), 122 - 125               | 2017 |           |                   |          |        | X            |        |          |                    |        |
| Zhao J-H, Tsai C-H, Chang Y-C                                                                  | Management of radicular cysts using platelet-rich fibrin and bioactive glass: A report of two cases. <i>Journal of the Formosan Medical Association</i> 113(7), 470-476 | 2014 |           |                   |          |        | X            |        |          |                    |        |

Continue

| Author                                                                                    | Reference                                                                                                                                                                                                                                                                | Year | Open<br>Apex | Primary<br>dentition | In<br>vitro | Animal | Case<br>Reports | Review | Of<br>Topic | Cochrane<br>Abstracts | Select |
|-------------------------------------------------------------------------------------------|--------------------------------------------------------------------------------------------------------------------------------------------------------------------------------------------------------------------------------------------------------------------------|------|--------------|----------------------|-------------|--------|-----------------|--------|-------------|-----------------------|--------|
| Saoud TMA, Huan,GT.-J, Gibbs JL,Sigurdsson A, Lin LM                                      | Management of teeth with persistent apical periodontitis after root canal treatment using regenerative. <i>Journal of Endodontics</i> , <b>41</b> (10), 1743-1748                                                                                                        | 2015 |              |                      |             |        | X               |        |             |                       |        |
| Honda MJ, Watanabe E, Mikami Y, Saito Y, Toriumi T, Shirakawa T <i>et al.</i>             | Mesenchymal dental stem cells for tissue regeneration. The <i>International Journal of Oral &amp; Maxillofacial Implant</i> <b>28</b> (6), e451–e460                                                                                                                     | 2013 |              |                      |             |        |                 |        | X           |                       |        |
| Bucchi C, de-Anta JM, Manzanares-Céspedes MC.                                             | Micro-Computed Tomographic Analysis of Apical Foramen Enlargement of Mature Teeth: A Cadaveric Study - Análisis Mediante Micro-CT del Ensanchamiento del Foramen Apical de Dientes Maduros: un Estudio Cadavérico. <i>Int. j. odontostomatol.</i> <b>14</b> (2), 177-182 | 2020 |              |                      |             |        |                 |        | X           |                       |        |
| Vidovic Zdrilic I, de Azevedo Queiroz IO, Matthews BG, Gomes-Filho JE, Mina M, Kalajzic I | Mineral trioxide aggregate improves healing response of periodontal tissue to injury in mice. <i>Journal of Periodontal Research</i> <b>52</b> (6), 1058–1067                                                                                                            | 2017 |              |                      |             | X      |                 |        |             |                       |        |
| Park J, Lee Y, Shin J, Lee HJ, Son YB, Park BW <i>et al.</i>                              | Mitochondrial genome mutations in mesenchymal stem cells derived from human dental induced pluripotent stem cells. <i>BMB Rep</i> <b>52</b> (12), 689-694                                                                                                                | 2019 |              |                      |             |        |                 |        | X           |                       |        |
| Brignardello-Petersen R                                                                   | Outcomes of platelet concentrates for treating immature permanent teeth are acceptable but do not seem to be better than those of other techniques. <i>Journal of the American Dental Association</i> <b>150</b> (5), E56                                                | 2019 | X            |                      |             |        |                 |        |             |                       |        |
| Meza G, Urrejola D, Saint Jean N, Inostroza C, López V, Khoury M                          | Personalized Cell Therapy for Pulpitis Using Autologous Dental Pulp Stem Cells and Leukocyte Platelet-rich Fibrin: A Case Report. <i>Journal of Endodontics</i> <b>45</b> (2), 144-149.                                                                                  | 2019 |              |                      |             |        | X               |        |             |                       |        |
| Mishra N,Narang I, Mittal N                                                               | Platelet-rich fibrin-mediated revitalization of immature necrotic tooth. <i>Contemp Clin Dent</i> <b>4</b> (3), 412-415                                                                                                                                                  | 2013 | X            |                      |             |        |                 |        |             |                       |        |
| Haque N, Abu Kasim NH                                                                     | Pooled Human Serum Increases Regenerative Potential of In Vitro Expanded Stem Cells from Human Extracted Deciduous Teeth. <i>Stem Cells: Biology and Engineering</i> <b>29</b> -44                                                                                       | 2017 |              |                      | X           |        |                 |        |             |                       |        |
| Yam GHE, Teo EPW, Setiawan M, Lovatt MJ, Yusoff NZBM, Fuest M                             | Postnatal periodontal ligament as a novel adult stem cell source for regenerative corneal cell therapy. <i>Journal of Cellular and Molecular Medicine</i> <b>22</b> (6), 3119-3132                                                                                       | 2018 |              |                      |             |        |                 |        | X           |                       |        |
| Chandrahassa S, Murray PE, Namerow KN                                                     | Proliferation of mature ex vivo human dental pulp using tissue engineering scaffolds. <i>Journal of Endodontics</i> <b>37</b> (9), 1236-1239                                                                                                                             | 2011 |              |                      | X           |        |                 |        |             |                       |        |
| Yamada Y, Ito K, Nakamura S, Ueda M, Nagasaka T                                           | Promising cell-based therapy for bone regeneration using stem cells from deciduous teeth, dental pulp, and bone marrow. <i>Cell Transplantation</i> <b>20</b> (7), 1003-1013                                                                                             | 2011 |              | X                    |             |        |                 |        |             |                       |        |

Continue

| Author                                                                           | Reference                                                                                                                                                                                                                                 | Year | Open<br>Apex | Primary<br>dentition | In<br>vitro | Animal | Case<br>Reports | Review | Of<br>Topic | Cochrane<br>Abstracts | Select |
|----------------------------------------------------------------------------------|-------------------------------------------------------------------------------------------------------------------------------------------------------------------------------------------------------------------------------------------|------|--------------|----------------------|-------------|--------|-----------------|--------|-------------|-----------------------|--------|
| St Paul A, Phillips C, Lee JY, Khan AA                                           | Provider Perceptions of Treatment Options for Immature Permanent Teeth. <i>Journal of Endodontics</i> 43(6), 910-915                                                                                                                      | 2017 | X            |                      |             |        |                 |        |             |                       |        |
| Harini PM, Tambakad PB, Naidu J                                                  | Pulp and Periodontal Regeneration of an Avulsed Permanent Mature Incisor Using Platelet-rich Plasma after Delayed Replantation: A 12-month Clinical Case Study. <i>Journal of Endodontics</i> 42(1), 66-71                                | 2016 |              |                      |             |        | X               |        |             |                       |        |
| Hargreaves KM, Diogenes A, Teixeira FB                                           | Pulp Injury and Changing Trends in Treatment. <i>Stem Cell Biology and Tissue Engineering in Dental Sciences</i> , 397-404                                                                                                                | 2015 |              |                      |             |        |                 |        | X           |                       |        |
| Orti V, Collart-Dutilleul PY, Piglionico S, Pall O, Cuisinier F, Panayotov I     | Pulp regeneration concepts for nonvital teeth: From tissue engineering to clinical approaches. <i>Tissue Engineering - Part B: Reviews</i> 24(6), 419-442                                                                                 | 2018 |              |                      |             |        |                 | X      |             |                       |        |
| Yang J, Yuan G, Chen Z                                                           | Pulp Regeneration: Current Approaches and Future Challenges. <i>Frontiers in Physiology</i> 7                                                                                                                                             | 2016 |              |                      |             |        |                 | X      |             |                       |        |
| Kratunova E, Silva D                                                             | Pulp therapy for primary and immature permanent teeth: an overview. <i>General Dentistry</i> 66(6), 30-38                                                                                                                                 | 2018 |              |                      |             |        |                 | X      |             |                       |        |
| El-Kateb NM, El-Backly RN, Amin WM, Abdalla AM                                   | Quantitative Assessment of Intracanal Regenerated Tissues after Regenerative Endodontic Procedures in Mature Teeth Using Magnetic Resonance Imaging: A Randomized Controlled Clinical Trial. <i>Journal of Endodontics</i> 46(5), 563-574 | 2020 |              |                      |             |        |                 |        |             |                       | X      |
| Saoud TMA, Ricucci D, Lin LM, Gaengler P                                         | Regeneration and Repair in Endodontics-A Special Issue of the Regenerative Endodontics-A New Era in Clinical Endodontics. <i>Dent J (Basel)</i> 4(1), 3.                                                                                  | 2016 |              |                      |             |        |                 | X      |             |                       |        |
| Roshene R                                                                        | Regeneration of dental pulp- A review. <i>Journal of Pharmaceutical Sciences and Research</i> 7(10), 858-860                                                                                                                              | 2015 |              |                      |             |        |                 | X      |             |                       |        |
| Hargreaves KM, Giesler T, Henry M, Wang Y                                        | Regeneration Potential of the Young Permanent Tooth: What Does the Future Hold? <i>Pediatric Dentistry</i> 30(3), 253-260                                                                                                                 | 2008 | X            |                      |             |        |                 |        |             |                       |        |
| Saoud TMA, Mistry S, Kahler B, Sigurdsson A, Lin LM                              | Regenerative Endodontic Procedures for Traumatized Teeth after Horizontal Root Fracture, Avulsion, and Perforating Root Resorption. <i>Journal of Endodontics</i> 42(10), 1476-1482                                                       | 2016 |              |                      |             |        |                 |        | X           |                       |        |
| Arslan H, Ahmed HMA, Şahin Y, Doğanay Yıldız E, Gündoğdu EC, Güven Y, Khalilov R | Regenerative Endodontic Procedures in Necrotic Mature Teeth with Periapical Radiolucencies: A Preliminary Randomized Clinical Study. <i>Journal of Endodontics</i> 45(7), 863-872                                                         | 2019 |              |                      |             |        |                 |        |             |                       | X      |
| Tong HJ, Rajan S, Bhujel N, Kang J, Duggal M, Nazzal H                           | Regenerative Endodontic Therapy in the Management of Nonvital Immature Permanent Teeth: A Systematic Review – Outcome Evaluation and Meta-analysis. <i>Journal of Endodontics</i> 43(9), 1453-1464                                        | 2017 |              |                      |             |        |                 | X      |             |                       |        |
| Chueh L-H, Ho Y-C, Kuo T-C, Lai W-H, Chen Y-HM, Chiang C-P                       | Regenerative Endodontic Treatment for Necrotic Immature Permanent Teeth . <i>J Endod</i> 35(2), 160-4                                                                                                                                     | 2009 | X            |                      |             |        |                 |        |             |                       |        |

Continue

| Author                                                                 | Reference                                                                                                                                                                                                    | Year | Open<br>Apex | Primary<br>dentition | In<br>vitro | Animal | Case<br>Reports | Review | Of<br>Topic | Cochrane<br>Abstracts | Select |
|------------------------------------------------------------------------|--------------------------------------------------------------------------------------------------------------------------------------------------------------------------------------------------------------|------|--------------|----------------------|-------------|--------|-----------------|--------|-------------|-----------------------|--------|
| Xu Q, Li,Z                                                             | Regenerative Endodontic Treatment of a Maxillary Mature Premolar. <i>Case Reports in Dentistry</i> (12), 1-5                                                                                                 | 2018 |              |                      |             |        | X               |        |             |                       |        |
| NCT04018456                                                            | Regenerative Endodontic Treatment of Mature Necrotic Teeth With Apical Periodontitis                                                                                                                         | 2019 |              |                      |             |        |                 |        |             | X                     |        |
| Paryani K, Kim SG                                                      | Regenerative endodontic treatment of permanent teeth after completion of root development: A report of 2 cases. <i>Journal of Endodontics</i> <b>39</b> (7), 929-934                                         | 2013 |              |                      |             |        | X               |        |             |                       |        |
| He L, Kim SG, Gong Q, Zhong J, Wang S, Zhou X et al.                   | Regenerative Endodontics for Adult Patients. <i>Journal of Endodontics</i> <b>43</b> (9), S57-S64                                                                                                            | 2017 |              |                      |             |        |                 | X      |             |                       |        |
| Rosa V, Botero TM, Nör JE                                              | Regenerative endodontics in light of the stem cell paradigm. <i>International Dental Journal</i> <b>61</b> , 23–28                                                                                           | 2011 |              |                      |             |        |                 | X      |             |                       |        |
| Bansal R, Bansal R                                                     | Regenerative endodontics: A state of the art. <i>Indian Journal of Dental Research</i> <b>22</b> (1), 122-131                                                                                                | 2011 |              |                      |             |        |                 | X      |             |                       |        |
| Chatha, NR                                                             | Regenerative endodontics: chart review of treated cases. Thesis of Master of Science in Dentistry                                                                                                            | 2017 |              |                      |             |        |                 | X      |             |                       |        |
| Vieira WA, McCusker CD                                                 | Regenerative models for the integration and regeneration of head skeletal tissues. <i>Int. J. Mol. Sci</i> <b>19</b> (12), 3752                                                                              | 2018 |              |                      |             |        |                 |        | X           |                       |        |
| Trope M                                                                | Regenerative Potential of Dental Pulp. <i>Pediatric Dentistry</i> <b>30</b> (3), 206-210                                                                                                                     | 2008 |              |                      |             |        |                 |        | X           |                       |        |
| Howard C                                                               | Regulation of dental pulp stem cell migration and regenerative endodontics.Thesis.                                                                                                                           | 2010 |              |                      |             |        |                 |        | X           |                       |        |
| Pohl Y, Filippi A, Kirschner H                                         | Results after replantation of avulsed permanent teeth. II. Periodontal healing and the role of physiologic storage and antiresorptive-regenerative therapy. <i>Dental Traumatology</i> <b>21</b> (2), 93-101 | 2005 |              |                      |             |        |                 |        | X           |                       |        |
| Pohl Y, Wahl G, Filippi A, Kirschner H                                 | Results after replantation of avulsed permanent teeth. III. Tooth loss and survival analysis. <i>Dental Traumatology</i> <b>21</b> (2), 102-110                                                              | 2005 |              |                      |             |        |                 |        | X           |                       |        |
| Correia TRO                                                            | Revascularização pulpar. Master thesis.                                                                                                                                                                      | 2018 |              |                      |             |        |                 | X      |             |                       |        |
| Moreu L                                                                | Revascularización pulpar: presentación de un caso clínico/ Pulp revascularization: report of a clinical case. <i>Rev. Fac. de Odon. UBA</i>                                                                  | 2018 |              |                      |             |        | X               |        |             |                       |        |
| Sridharan S, Neelakantan I,Neelakantan P                               | Revascularization in endodontics. <i>International Journal of Clinical Dentistry</i> <b>7</b> ( 2), 139-145.                                                                                                 | 2014 |              |                      |             |        |                 | X      |             |                       |        |
| Neelamurthy, P.S., Kumar RA, Balakrishnan V, Narayan GS, Karthikeyan I | Revascularization in Immature and Mature Teeth with Necrotic Pulp: A Clinical Study. <i>Journal of Contemporary Dental Practice</i> <b>19</b> (11), 1394-1400                                                | 2018 | X            |                      |             |        |                 |        |             |                       |        |
| Cehreli ZC, Sara S, Aksoy B                                            | Revascularization of immature permanent incisors after severe extrusive luxation injury. <i>Journal of the Canadian Dental Association</i> <b>78</b> (1), c4                                                 | 2012 | X            |                      |             |        |                 |        |             |                       |        |

Continue

| Author                                                                     | Reference                                                                                                                                                                                                       | Year | Open Apex | Primary dentition | In vitro | Animal | Case Reports | Review | Of Topic | Cochrane Abstracts | Select |
|----------------------------------------------------------------------------|-----------------------------------------------------------------------------------------------------------------------------------------------------------------------------------------------------------------|------|-----------|-------------------|----------|--------|--------------|--------|----------|--------------------|--------|
| Moreno-Hidalgo MC, Caleza-Jimenez C, Mendoza-Mendoza A, Iglesias-Linares A | Revascularization of immature permanent teeth with apical periodontitis. <i>Int Endod J</i> 47(4), 321-331                                                                                                      | 2014 | X         |                   |          |        |              |        |          |                    |        |
| Wigler R, Kaufman AY, Lin S, Hazan-Molina H, Torneck CD                    | Revascularization: A treatment for permanent teeth with necrotic pulp and incomplete root development. <i>Journal of Endodontics</i> 39(3), 319-326                                                             | 2013 | X         |                   |          |        |              |        |          |                    |        |
| Nagas EM, Uyanik O, Cehreli ZC                                             | Revitalization of necrotic mature permanent incisors with apical periodontitis: a case report. <i>Restor Dent Endod</i> 43(3), e31                                                                              | 2018 |           |                   |          |        | X            |        |          |                    |        |
| CTRI/2012/11/003102                                                        | Root canal treatment without obturation with regenerative technique                                                                                                                                             | 2012 |           |                   |          |        |              |        |          | X                  |        |
| Shah N, Logani A                                                           | SealBio: A novel, non-obturation endodontic treatment based on concept of regeneration. <i>J Conserv Dent</i> 15(4), 328-332                                                                                    | 2012 |           |                   |          |        |              |        |          |                    | X      |
| Yoshimi R, Yamada Y, Ito K, Baba S, Ueda M                                 | Self-assembling peptide nanofiber scaffolds, platelet-rich plasma, and mesenchymal stem cells for injectable bone regeneration with tissue engineering. <i>Journal of Craniofacial Surgery</i> 20(5), 1523-1530 | 2009 |           |                   |          |        |              |        | X        |                    |        |
| Alkilzy M, Tarabaih A, Santamaria RM, Splieth CH                           | Self-assembling Peptide P(11)-4 and Fluoride for Regenerating Enamel. <i>Journal of Dental Research</i> 97(2), 148-154                                                                                          | 2018 |           |                   |          |        |              |        | X        |                    |        |
| Altaii M, Broberg M, Cathro P, Richards L                                  | Standardisation of sheep model for endodontic regeneration/revitalisation research. <i>Archives of Oral Biology</i> 65, 87-94                                                                                   | 2016 |           |                   |          | X      |              |        |          |                    |        |
| Yeasmin S, Ceccarelli J, Vigen M, Tarle SA, Kaigler D                      | Stem cells derived from tooth periodontal ligament enhance functional angiogenesis by endothelial cells. <i>Tissue Engineering - Part A</i> 20(7-8), 1188-1196                                                  | 2014 |           |                   | X        |        |              |        |          |                    |        |
| Martinez Saez D, Sasaki RT, Neves AC, da Silva MCP                         | Stem Cells from Human Exfoliated Deciduous Teeth: A Growing Literature. <i>Cells Tissues Organs</i> 16(202),269–280                                                                                             | 2015 |           | X                 |          |        |              |        |          |                    |        |
| Khazaei M, Bozorgi A, Khazaei S, Khademi A                                 | Stem cells in dentistry, sources, and applications. <i>Dental Hypotheses</i> 7(2), 42-52.                                                                                                                       | 2016 |           |                   |          |        |              |        | X        |                    |        |
| NCT03717337                                                                | Success Rate of Single Versus Two Visit Regenerative Treatment Protocol in Non Vital Mature Anterior Teeth                                                                                                      | 2018 |           |                   |          |        |              |        |          | X                  |        |
| Chrepa V, Pitcher B, Henry MA, Diogenes A                                  | Survival of the Apical Papilla and Its Resident Stem Cells in a Case of Advanced Pulpal Necrosis and Apical Periodontitis. <i>Journal of Endodontics</i> 43(4), 561-567                                         | 2017 |           |                   | X        |        |              |        |          |                    |        |
| Chrepa V, Pitcher B, Henry MA, Diogenes A                                  | Transforming Growth Factor Beta 1 Distribution and Content in the Root Dentin of Young Mature and Immature Human Premolars                                                                                      | 2017 |           |                   | X        |        |              |        |          |                    |        |
| Chien Y, Chang YL, Li HY, Lee SD, Huang P                                  | Synergistic effects of carboxymethyl-hexanoyl chitosan, cationic polyurethane-short branch PEI in miR122 gene delivery: Accelerated differentiation of iPSCs into mature                                        | 2015 |           |                   |          |        |              |        | X        |                    |        |

Continue

| Author                                                                                                | Reference                                                                                                                                                                                                                                                                                                                               | Year | Open Apex | Primary dentition | In vitro | Animal | Case Reports | Review | Of Topic | Cochrane Abstracts | Select |
|-------------------------------------------------------------------------------------------------------|-----------------------------------------------------------------------------------------------------------------------------------------------------------------------------------------------------------------------------------------------------------------------------------------------------------------------------------------|------|-----------|-------------------|----------|--------|--------------|--------|----------|--------------------|--------|
|                                                                                                       | hepatocyte-like cells and improved stem cell therapy in a hepatic failure model. <i>Acta Biomaterialia</i> <b>13</b> , 228-244                                                                                                                                                                                                          |      |           |                   |          |        |              |        |          |                    |        |
| D'Souza RN, Regan KR, Fisher JP, Mikos AG                                                             | The bioengineering of dental tissues .                                                                                                                                                                                                                                                                                                  | 2012 |           |                   |          |        |              |        | X        |                    |        |
| Laureys WGM, Cuvelier CA, Dermaut LR, De Pauw GAM                                                     | The critical apical diameter to obtain regeneration of the pulp tissue after tooth transplantation, replantation, or regenerative endodontic treatment. <i>Journal of Endodontics</i> <b>39</b> (6), 759-763                                                                                                                            | 2013 |           |                   | X        |        |              |        |          |                    |        |
| Tamaoki N, Takahashi K, Aoki H, Yamanaka S, Tezuka K-I                                                | The homeobox gene DLX4 promotes generation of human induced pluripotent stem cells. <i>Scientific Reports</i> <b>4</b> , 7283                                                                                                                                                                                                           | 2014 |           |                   | X        |        |              |        |          |                    |        |
| Biggerstaff R                                                                                         | The residual antibacterial effects of radiopaque double antibiotic paste after various treatment times. Master Thesis                                                                                                                                                                                                                   | 2018 |           |                   |          |        |              |        | X        |                    |        |
| Kim RH, Mehrazarin S, Kang MK                                                                         | Therapeutic Potential of Mesenchymal Stem Cells for Oral and Systemic Diseases. <i>Dental Clinics of North America</i> <b>56</b> (3), 651-675                                                                                                                                                                                           | 2012 |           |                   |          |        |              |        | X        |                    |        |
| Schreurs M., Suttorp CM, Mutsaers HA , Kuijpers-Jagtman AM, den Hoff JW, Ongkosuwito EM <i>et al.</i> | Tissue engineering strategies combining molecular targets against inflammation and fibrosis, and umbilical cord blood stem cells to improve hampered muscle and skin regeneration following cleft repair. <i>Medicinal Research Reviews</i> <b>40</b> (1), 9-26.                                                                        | 2020 |           |                   |          |        |              |        | X        |                    |        |
| Langova P, Stembirek J, Matalova E, Buchtova M                                                        | Tooth autotransplantations - lessons from animal models: a review. <i>Veterinarni medicina</i> <b>60</b> (6), 293-300                                                                                                                                                                                                                   | 2015 |           |                   |          |        |              | X      |          |                    |        |
| Yelick PC, Sharp PT                                                                                   | Tooth Bioengineering and Regenerative Dentistry. <i>Journal of dental research</i> <b>98</b> (11), 1173-1182                                                                                                                                                                                                                            | 2019 |           |                   |          |        |              |        | X        |                    |        |
| Brizuela C, Urrejola D, Meza G, Angelopoulos I, Khoury M                                              | Translational pathway of scalable, allogenic encapsulated mesenchymal stem cells for dental pulp regeneration. Ranokure a controlled phase i/ii clinical trial designed to evaluate the survival of mature permanent teeth with apical lesion following a regenerative endodontics procedure. <i>Cytotherapy</i> <b>20</b> (5), S93-S94 | 2018 |           |                   |          |        |              |        | X        |                    |        |
| Saoud TMA, Sigurdsson A, Rosenberg PA, Lin LM, Ricucci D                                              | Treatment of a large cyst like inflammatory periapical lesion associated with mature necrotic teeth using regenerative endodontic therapy. <i>Journal of Endodontics</i> <b>40</b> (12), 2081-2086                                                                                                                                      | 2014 |           |                   |          |        | X            |        |          |                    |        |
| Saoud TM, Martin G, Chen YHM, Chen KL, Chen CA, Songtrakul K                                          | Treatment of Mature Permanent Teeth with Necrotic Pulp and Apical Periodontitis Using Regenerative Endodontic Procedures: A Case Series. <i>Journal of Endodontics</i> <b>42</b> (1), 57-65                                                                                                                                             | 2016 |           |                   |          |        | X            |        |          |                    |        |
| CTRI/2019/04/018503                                                                                   | Treatment of permanent teeth with diseased pulp using natural regeneration technique to regain pulp sensation and natural defense mechanism for pulp                                                                                                                                                                                    | 2019 |           |                   |          |        |              |        |          | X                  |        |

Continue

| Author                                                                        | Reference                                                                                                                                                                                                                                                                                                     | Year | Open<br>Apex | Primary<br>dentition | In<br>vitro | Animal | Case<br>Reports | Review | Of<br>Topic | Cochrane<br>Abstracts | Select |
|-------------------------------------------------------------------------------|---------------------------------------------------------------------------------------------------------------------------------------------------------------------------------------------------------------------------------------------------------------------------------------------------------------|------|--------------|----------------------|-------------|--------|-----------------|--------|-------------|-----------------------|--------|
| Oshima M, Tsuji T                                                             | Whole tooth regeneration as a future dental treatment.<br><i>Advances in Experimental Medicine and Biology</i> <b>881</b> , 255-269                                                                                                                                                                           | 2015 |              |                      |             |        |                 | X      |             |                       |        |
| ElSheshtawy AS,<br>Nazza H, El Shahawy<br>OI, El Baz AA, Ismail<br>SM, Kang J | The effect of platelet-rich plasma as a scaffold in<br>regeneration/revitalization endodontics of immature<br>permanent teeth assessed using 2-dimensional radiographs<br>and cone beam computed tomography: a randomized<br>controlled trial. <i>International endodontic journal</i> <b>53</b> (7), 905-921 | 2020 | X            |                      |             |        |                 |        |             |                       |        |

Continue
