# Supplementary material for: Prognosis of Regenerative Endodontic Procedures in Mature Teeth: A Systematic Review and Meta-Analysis of Clinical and Radiographic Parameters
Source: MDPI journal article supplement (doi:10.3390/ma14164418), 2021-08-06
Supplement: s1 [file s1]

# Prognosis of regenerative endodontic procedures in mature teeth: a systematic review and meta-analysis of clinical and radiographic parameters

**Table S1.** Electronic Database and Search Strategy

|                                                                                                                                                                                                          |                                                                                                                                                                                      |
|----------------------------------------------------------------------------------------------------------------------------------------------------------------------------------------------------------|--------------------------------------------------------------------------------------------------------------------------------------------------------------------------------------|
| <b>PUBMED</b>                                                                                                                                                                                            |                                                                                                                                                                                      |
| #1 Dentition, Permanent[MeSH Terms]) OR Dentition, Secondary[Title/Abstract]) OR Dentition, Adult[Title/Abstract]) OR "Mature teeth"[Title/Abstract]) OR "Mature tooth"[Title/Abstract]                  | #2 Regenerative Endodontics[MeSH Terms]) OR Endodontic, Regenerative[Title/Abstract]) OR "Regenerative Medicine"[Title/Abstract]) OR Revitalization[Title/Abstract]                  |
| <b>#1 AND #2</b>                                                                                                                                                                                         |                                                                                                                                                                                      |
| <b>SCOPUS</b>                                                                                                                                                                                            |                                                                                                                                                                                      |
| #1 (TITLE-ABS KEY (dentition, AND permanent) OR TITLE-ABS-KEY (dentition, AND secondary) OR TITLE-ABS-KEY (dentition, AND adult) OR TITLE-ABS-KEY (mature AND teeth) OR TITLE-ABS-KEY (mature AND tooth) | #2 (TITLE-ABS-KEY (regenerative AND endodontics) OR TITLE-ABS-KEY (endodontic, AND regenerative) OR TITLE-ABS-KEY (regenerative AND medicine) OR TITLE-ABS-KEY (revitalization)      |
| <b>#1AND #2</b>                                                                                                                                                                                          |                                                                                                                                                                                      |
| <b>WEB OF SCIENCE</b>                                                                                                                                                                                    |                                                                                                                                                                                      |
| #1 TÍTULO:(Dentition, Permanent) OR TÓPICO:(Dentition, Secondary) OR TÓPICO:(Dentition, Adult) OR TÓPICO: (Mature teeth) OR TÓPICO: (Mature tooth)                                                       | #2 TÍTULO:(Regenerative Endodontics) OR TÓPICO: (Endodontic, Regenerative) OR TÓPICO: (Regenerative Medicine) OR TÓPICO: (Revitalization)                                            |
| <b>#1 AND #2</b>                                                                                                                                                                                         |                                                                                                                                                                                      |
| <b>LILACS/BBO</b>                                                                                                                                                                                        |                                                                                                                                                                                      |
| #1 mh:(Dentition, Permanent)) OR (tw:(Dentition, Secondary )) OR (tw:(Dentition, Adult)) OR (tw:(Mature tooth )) OR (tw:(Mature teeth ))                                                                 | #2 (mh:(Regenerative Endodontics)) OR (tw:(Endodontic, Regenerative )) OR (tw:(Regenerative Medicine )) OR (tw:(Revitalization))                                                     |
| <b>#1 AND #2</b>                                                                                                                                                                                         |                                                                                                                                                                                      |
| <b>COCHRANE LIBRARY</b>                                                                                                                                                                                  |                                                                                                                                                                                      |
| #1 Dentition, Permanent<br>#2 (Dentition, Secondary):ti,ab,kw OR (Dentition, Adult):ti,ab,kw OR (Mature teeth):ti,ab,kw OR (Mature tooth):ti,ab,kw                                                       | #3 Regenerative Endodontics<br>#4 (Endodontic, Regenerative):ti,ab,kw OR (Regenerative Medicine):ti,ab,kw OR (Revitalization):ti,ab,kw<br>#5 #1 OR #2<br>#6 #3 OR #4<br>#7 #5 AND #6 |
